# Supplementary material for: Association of Age-Related Macular Degeneration with a Blood Biomarker of Lipopolysaccharide, a Gut Bacterial Proinflammatory Toxin
Source: PubMed Central journal article supplement — Invest Ophthalmol Vis Sci. 2023 Nov 30;64(14):47. doi: 10.1167/iovs.64.14.47 (PMC10691392; doi:10.1167/iovs.64.14.47), 2023-11-30
Supplement: iovs-64-14-47_s001.pdf [file iovs-64-14-47_s001.pdf]

## Supplementary Online Content

**eTable 1.** Fraction of missing/imputed data

**eFigure 1.** Identification of outliers of 3-OH FAs using Tukey's Interquartile Range criterion

**eTable 1.** Fraction of missing/imputed data on subject level\*

|                          | Early AMD (n = 446) | Late AMD (n = 548) |
|--------------------------|---------------------|--------------------|
|                          | n (%)               |                    |
| Smoking (pack-year)      | 2 (0.4 %)           | 2 (0.4 %)          |
| Mediterranean diet score | 32 (7.2 %)          | 37 (6.8 %)         |
| Triglycerides            | 1 (0.2 %)           | 1 (0.2 %)          |
| Genetic risk score       | 55 (12.3 %)         | 74 (13.5 %)        |

\*If the variable is not listed here, no data was missing for this variable.

AMD: age-related macular degeneration



**eFigure 1.** Identification of outliers of 3-OH FAs using Tukey's Interquartile Range criterion: 28 eyes of 15 participants were identified and excluded as outliers ( $n = 1009$  before exclusion and  $n = 981$  after exclusion). AMD: age-related macular degeneration; 3-OH FAs: 3-hydroxy fatty acids.
